# Supplementary material for: A 13-Gene Metabolic Prognostic Signature Is Associated With Clinical and Immune Features in Stomach Adenocarcinoma
Source: Front Oncol. 2021 Jun 21;11:612952. doi: 10.3389/fonc.2021.612952 (PMC8256842; doi:10.3389/fonc.2021.612952)
Supplement: Supplementary file 11 [file Table_11.xlsx]

## Sheet: Sheet1
Supplementary table 11: Clinical data for STAD form GEO.
id	Age	Gender	T	N
GSM2235908	32	Female	T3	N0
GSM2235577	32	Female	T4	N0
GSM2235823	32	Female	T4	N1
GSM2235636	32	Female	T4	N2
GSM2235561	33	Female	T4	N2
GSM2236086	36	Female	T4	N0
GSM2235941	36	Female	T2	N1
GSM2235791	36	Female	T4	N1
GSM2235888	36	Female	T4	N1
GSM2235754	37	Female	T4	N1
GSM2235744	38	Female	T4	N1
GSM2235954	39	Female	T3	N1
GSM2235728	40	Female	T4	N1
GSM2236053	41	Female	T4	N2
GSM2235939	42	Female	T2	N0
GSM2235994	42	Female	T3	N1
GSM2235695	42	Female	T4	N1
GSM2235717	43	Female	T4	N3
GSM2236049	44	Female	T4	N1
GSM2235734	45	Female	T4	N1
GSM2235557	47	Female	T4	N3
GSM2236063	48	Female	T2	N1
GSM2235756	48	Female	T4	N2
GSM2236001	48	Female	T4	N2
GSM2235565	49	Female	T4	N0
GSM2236054	49	Female	T4	N0
GSM2235777	49	Female	T4	N1
GSM2235824	49	Female	T4	N2
GSM2236047	49	Female	T4	N2
GSM2235786	50	Female	T4	N1
GSM2235878	51	Female	T4	N3
GSM2236031	52	Female	T4	N0
GSM2235625	53	Female	T4	N0
GSM2236082	53	Female	T4	N0
GSM2235704	53	Female	T4	N1
GSM2235847	53	Female	T4	N1
GSM2235996	53	Female	T4	N1
GSM2235747	53	Female	T4	N2
GSM2235986	53	Female	T3	N3
GSM2235988	54	Female	T1	N0
GSM2235709	54	Female	T2	N0
GSM2235979	54	Female	T2	N1
GSM2235605	54	Female	T4	N1
GSM2236071	54	Female	T4	N1
GSM2235844	54	Female	T4	N2
GSM2235937	54	Female	T4	N2
GSM2235619	55	Female	T4	N1
GSM2235837	56	Female	T2	N0
GSM2235928	56	Female	T4	N1
GSM2235952	56	Female	T4	N1
GSM2235933	57	Female	T4	N0
GSM2235995	57	Female	T3	N2
GSM2235853	58	Female	T2	N1
GSM2235568	58	Female	T3	N1
GSM2235953	58	Female	T4	N1
GSM2235787	58	Female	T4	N2
GSM2235963	58	Female	T4	N2
GSM2235973	59	Female	T3	N0
GSM2235945	59	Female	T4	N1
GSM2236084	59	Female	T3	N2
GSM2235738	59	Female	T4	N2
GSM2235603	60	Female	T4	N1
GSM2235792	60	Female	T4	N1
GSM2235563	60	Female	T3	N2
GSM2236023	61	Female	T2	N0
GSM2236088	61	Female	T4	N0
GSM2235602	61	Female	T3	N1
GSM2235805	61	Female	T4	N1
GSM2235951	61	Female	T4	N1
GSM2235849	61	Female	T4	N2
GSM2235938	62	Female	T1	N0
GSM2235755	62	Female	T4	N1
GSM2235936	63	Female	T1	N0
GSM2235707	63	Female	T2	N1
GSM2235731	63	Female	T2	N1
GSM2235761	63	Female	T4	N1
GSM2236066	63	Female	T4	N1
GSM2235722	63	Female	T4	N2
GSM2235785	64	Female	T3	N0
GSM2236000	64	Female	T3	N1
GSM2236008	64	Female	T3	N1
GSM2235634	64	Female	T4	N1
GSM2235743	64	Female	T4	N1
GSM2236037	64	Female	T4	N1
GSM2236083	64	Female	T4	N2
GSM2235725	65	Female	T4	N0
GSM2235631	66	Female	T4	N0
GSM2235901	66	Female	T3	N1
GSM2235883	66	Female	T4	N2
GSM2235970	66	Female	T4	N2
GSM2235854	66	Female	T4	N3
GSM2235790	67	Female	T4	N0
GSM2236013	67	Female	T2	N1
GSM2235976	67	Female	T3	N1
GSM2235880	67	Female	T4	N2
GSM2235730	68	Female	T1	N1
GSM2236061	68	Female	T2	N1
GSM2235879	68	Female	T3	N1
GSM2236025	68	Female	T3	N1
GSM2235572	68	Female	T4	N1
GSM2235817	68	Female	T4	N1
GSM2236002	68	Female	T4	N1
GSM2235956	68	Female	T4	N2
GSM2236089	69	Female	T4	N0
GSM2235957	69	Female	T3	N2
GSM2235867	69	Female	T4	N2
GSM2236042	69	Female	T4	N2
GSM2235985	69	Female	T4	N3
GSM2235712	70	Female	T2	N0
GSM2236020	70	Female	T4	N0
GSM2235906	70	Female	T4	N1
GSM2236040	71	Female	T3	N1
GSM2235815	71	Female	T4	N2
GSM2235932	71	Female	T4	N2
GSM2235969	72	Female	T2	N1
GSM2236005	72	Female	T4	N2
GSM2235795	73	Female	T4	N0
GSM2235885	73	Female	T4	N1
GSM2235609	73	Female	T4	N2
GSM2235618	73	Female	T4	N2
GSM2235702	74	Female	T4	N1
GSM2235763	74	Female	T4	N1
GSM2235818	74	Female	T4	N3
GSM2235637	75	Female	T4	N0
GSM2236059	75	Female	T2	N1
GSM2235886	76	Female	T2	N1
GSM2236007	76	Female	T4	N1
GSM2235907	77	Female	T4	N0
GSM2235923	77	Female	T4	N1
GSM2235576	78	Female	T3	N2
GSM2235611	78	Female	T4	N2
GSM2235797	79	Female	T3	N0
GSM2235866	79	Female	T4	N2
GSM2236027	80	Female	T4	N1
GSM2235562	81	Female	T4	N2
GSM2235841	84	Female	T4	N1
GSM2235571	85	Female	T3	N1
GSM2235993	27	Male	T3	N1
GSM2235614	27	Male	T4	N2
GSM2235773	30	Male	T4	N2
GSM2236021	32	Male	T4	N3
GSM2236012	33	Male	T4	N3
GSM2235902	34	Male	T4	N1
GSM2235931	34	Male	T4	N1
GSM2236051	34	Male	T4	N2
GSM2235698	34	Male	T3	N3
GSM2235703	35	Male	T4	N2
GSM2235948	36	Male	T4	N1
GSM2236018	36	Male	T4	N2
GSM2235606	38	Male	T4	N2
GSM2235751	40	Male	T3	N1
GSM2235966	40	Male	T4	N3
GSM2235721	41	Male	T2	N1
GSM2235752	42	Male	T4	N1
GSM2236006	42	Male	T4	N1
GSM2235758	42	Male	T4	N2
GSM2235628	43	Male	T3	N1
GSM2235949	43	Male	T4	N1
GSM2235884	44	Male	T4	N0
GSM2236032	44	Male	T4	N0
GSM2236068	44	Male	T4	N0
GSM2236029	44	Male	T2	N1
GSM2235865	44	Male	T4	N1
GSM2236075	44	Male	T4	N1
GSM2235566	44	Male	T4	N2
GSM2235757	44	Male	T4	N2
GSM2235950	45	Male	T4	N1
GSM2235971	45	Male	T3	N2
GSM2235803	46	Male	T3	N0
GSM2235716	46	Male	T3	N1
GSM2235983	46	Male	T3	N1
GSM2235718	46	Male	T4	N1
GSM2235768	46	Male	T4	N1
GSM2235900	46	Male	T4	N1
GSM2235626	46	Male	T4	N2
GSM2235944	47	Male	T3	N0
GSM2235774	47	Male	T4	N1
GSM2235827	47	Male	T4	N2
GSM2235926	47	Male	T4	N2
GSM2236067	47	Male	T4	N2
GSM2236060	47	Male	T4	N3
GSM2236043	48	Male	T3	N1
GSM2235899	48	Male	T4	N1
GSM2236044	48	Male	T2	N2
GSM2235955	48	Male	T4	N2
GSM2235816	48	Male	T4	N3
GSM2235697	49	Male	T3	N0
GSM2235741	49	Male	T4	N2
GSM2236072	49	Male	T3	N3
GSM2235801	50	Male	T2	N1
GSM2235903	50	Male	T4	N1
GSM2236041	50	Male	T4	N1
GSM2235622	50	Male	T3	N2
GSM2236095	51	Male	T4	N0
GSM2235850	51	Male	T2	N1
GSM2235982	51	Male	T3	N2
GSM2235567	51	Male	T4	N2
GSM2235737	51	Male	T4	N2
GSM2235845	51	Male	T4	N2
GSM2235968	52	Male	T2	N0
GSM2235829	52	Male	T4	N0
GSM2235723	52	Male	T3	N2
GSM2235573	52	Male	T4	N2
GSM2235848	52	Male	T4	N2
GSM2235746	53	Male	T3	N1
GSM2235771	53	Male	T4	N1
GSM2235735	53	Male	T3	N2
GSM2235600	53	Male	T4	N2
GSM2235745	53	Male	T4	N2
GSM2235767	53	Male	T4	N2
GSM2236016	53	Male	T4	N2
GSM2236022	53	Male	T4	N3
GSM2235710	54	Male	T4	N0
GSM2236056	54	Male	T4	N0
GSM2236024	54	Male	T3	N1
GSM2235810	54	Male	T4	N1
GSM2235864	54	Male	T4	N1
GSM2235617	54	Male	T4	N2
GSM2235759	54	Male	T4	N2
GSM2235924	54	Male	T4	N2
GSM2235806	55	Male	T4	N0
GSM2236034	55	Male	T4	N0
GSM2236055	55	Male	T4	N0
GSM2236085	55	Male	T4	N0
GSM2235794	55	Male	T1	N1
GSM2235608	55	Male	T3	N1
GSM2235822	55	Male	T3	N1
GSM2235828	55	Male	T4	N1
GSM2235882	55	Male	T4	N1
GSM2235961	55	Male	T4	N1
GSM2236003	55	Male	T4	N1
GSM2235811	55	Male	T4	N2
GSM2235946	55	Male	T4	N2
GSM2235958	55	Male	T4	N2
GSM2235720	56	Male	T1	N0
GSM2235781	56	Male	T1	N0
GSM2235788	56	Male	T2	N0
GSM2236039	56	Male	T2	N0
GSM2235593	56	Male	T4	N0
GSM2235623	56	Male	T3	N1
GSM2235588	56	Male	T4	N1
GSM2235910	56	Male	T4	N1
GSM2235921	57	Male	T2	N2
GSM2235560	58	Male	T4	N0
GSM2236092	58	Male	T4	N0
GSM2235965	58	Male	T3	N1
GSM2235715	58	Male	T4	N1
GSM2235809	58	Male	T4	N1
GSM2235764	58	Male	T4	N2
GSM2236065	58	Male	T4	N2
GSM2236093	59	Male	T3	N0
GSM2235713	59	Male	T4	N0
GSM2235575	59	Male	T3	N1
GSM2235624	59	Male	T3	N1
GSM2235808	59	Male	T4	N1
GSM2235992	59	Male	T4	N1
GSM2235700	59	Male	T4	N2
GSM2235975	59	Male	T3	N3
GSM2235802	60	Male	T1	N0
GSM2236078	60	Male	T4	N0
GSM2235843	60	Male	T2	N1
GSM2235632	60	Male	T3	N1
GSM2235696	60	Male	T4	N1
GSM2235775	60	Male	T4	N1
GSM2235999	60	Male	T4	N1
GSM2235772	60	Male	T4	N2
GSM2236073	60	Male	T4	N2
GSM2235701	61	Male	T3	N0
GSM2235714	61	Male	T2	N1
GSM2235556	61	Male	T3	N1
GSM2235564	61	Male	T3	N1
GSM2236010	61	Male	T4	N1
GSM2236052	61	Male	T4	N1
GSM2235959	61	Male	T3	N2
GSM2235580	61	Male	T4	N2
GSM2235736	61	Male	T4	N2
GSM2235766	61	Male	T4	N2
GSM2235967	61	Male	T4	N2
GSM2236017	61	Male	T4	N2
GSM2235778	61	Male	T4	N3
GSM2236080	62	Male	T4	N0
GSM2236036	62	Male	T1	N1
GSM2236057	62	Male	T2	N1
GSM2236058	62	Male	T2	N1
GSM2236074	62	Male	T2	N1
GSM2235800	62	Male	T3	N1
GSM2235904	62	Male	T4	N1
GSM2235947	62	Male	T4	N1
GSM2235599	62	Male	T3	N2
GSM2235742	62	Male	T4	N2
GSM2235782	62	Male	T4	N2
GSM2235796	62	Male	T4	N3
GSM2235799	62	Male	T4	N3
GSM2235779	63	Male	T4	N0
GSM2236030	63	Male	T4	N0
GSM2235596	63	Male	T3	N1
GSM2235839	63	Male	T3	N1
GSM2236076	63	Male	T3	N1
GSM2235905	63	Male	T4	N1
GSM2236045	63	Male	T4	N1
GSM2235621	63	Male	T4	N2
GSM2235633	63	Male	T4	N2
GSM2235909	63	Male	T4	N2
GSM2235930	63	Male	T4	N2
GSM2235934	63	Male	T4	N2
GSM2235940	63	Male	T4	N2
GSM2235974	63	Male	T4	N2
GSM2235813	64	Male	T3	N0
GSM2236048	64	Male	T3	N0
GSM2235804	64	Male	T4	N0
GSM2236094	64	Male	T4	N0
GSM2235925	64	Male	T4	N1
GSM2235962	64	Male	T4	N1
GSM2236046	64	Male	T4	N1
GSM2235769	64	Male	T3	N2
GSM2236011	64	Male	T3	N2
GSM2235760	64	Male	T4	N2
GSM2235789	64	Male	T4	N2
GSM2235964	64	Male	T4	N2
GSM2235582	65	Male	T4	N0
GSM2236026	65	Male	T3	N1
GSM2236050	65	Male	T3	N1
GSM2235630	65	Male	T4	N1
GSM2235711	65	Male	T4	N1
GSM2235927	65	Male	T4	N1
GSM2235943	65	Male	T4	N1
GSM2235607	65	Male	T3	N2
GSM2235620	65	Male	T3	N2
GSM2235762	65	Male	T4	N2
GSM2235935	65	Male	T4	N2
GSM2235978	65	Male	T4	N2
GSM2236038	65	Male	T4	N2
GSM2235749	65	Male	T4	N3
GSM2235838	65	Male	T4	N3
GSM2235862	66	Male	T4	N0
GSM2235708	66	Male	T4	N1
GSM2235889	66	Male	T4	N1
GSM2235960	66	Male	T4	N1
GSM2235980	66	Male	T4	N1
GSM2236004	66	Male	T4	N1
GSM2236009	66	Male	T4	N1
GSM2235739	66	Male	T3	N2
GSM2235589	66	Male	T4	N2
GSM2236015	66	Male	T4	N2
GSM2235814	66	Male	T4	N3
GSM2235942	67	Male	T1	N0
GSM2235863	67	Male	T4	N0
GSM2236079	67	Male	T2	N1
GSM2235705	67	Male	T4	N1
GSM2235821	67	Male	T4	N1
GSM2235729	67	Male	T4	N2
GSM2235846	67	Male	T4	N2
GSM2235972	67	Male	T4	N3
GSM2236014	68	Male	T3	N0
GSM2236028	68	Male	T3	N0
GSM2235597	68	Male	T2	N1
GSM2235613	68	Male	T2	N1
GSM2235855	68	Male	T2	N1
GSM2235627	68	Male	T3	N1
GSM2236087	68	Male	T3	N1
GSM2235765	68	Male	T4	N1
GSM2235819	68	Male	T4	N1
GSM2235922	68	Male	T4	N1
GSM2235998	68	Male	T4	N1
GSM2235615	68	Male	T3	N2
GSM2235578	68	Male	T4	N2
GSM2235719	68	Male	T4	N2
GSM2235726	68	Male	T4	N2
GSM2236077	68	Male	T4	N2
GSM2235699	68	Male	T4	N3
GSM2235812	68	Male	T4	N3
GSM2236033	69	Male	T3	N0
GSM2235825	69	Male	T4	N0
GSM2235740	69	Male	T3	N1
GSM2236062	69	Male	T3	N1
GSM2236069	69	Male	T3	N1
GSM2235981	69	Male	T4	N1
GSM2235987	69	Male	T4	N1
GSM2235612	69	Male	T4	N2
GSM2235852	69	Male	T4	N3
GSM2235984	69	Male	T4	N3
GSM2236064	70	Male	T4	N0
GSM2235750	70	Male	T4	N1
GSM2235807	70	Male	T4	N3
GSM2235840	71	Male	T2	N0
GSM2235585	71	Male	T3	N1
GSM2235783	71	Male	T3	N1
GSM2236070	71	Male	T3	N1
GSM2235586	71	Male	T4	N1
GSM2235584	71	Male	T4	N2
GSM2235706	71	Male	T4	N2
GSM2235727	71	Male	T4	N3
GSM2235881	72	Male	T4	N0
GSM2235733	72	Male	T3	N1
GSM2235558	72	Male	T4	N1
GSM2235587	72	Male	T4	N1
GSM2235753	72	Male	T4	N1
GSM2235574	72	Male	T4	N2
GSM2235977	72	Male	T4	N2
GSM2235842	72	Male	T4	N3
GSM2235616	73	Male	T4	N1
GSM2235635	73	Male	T2	N2
GSM2235732	74	Male	T2	N1
GSM2235579	74	Male	T3	N1
GSM2235598	74	Male	T3	N1
GSM2235595	74	Male	T4	N1
GSM2235997	74	Male	T4	N1
GSM2235929	74	Male	T4	N2
GSM2235724	74	Male	T3	N3
GSM2235604	75	Male	T3	N1
GSM2235820	75	Male	T4	N1
GSM2235830	75	Male	T4	N2
GSM2235780	75	Male	T4	N3
GSM2235610	76	Male	T4	N2
GSM2235798	76	Male	T4	N2
GSM2236091	77	Male	T3	N0
GSM2235570	77	Male	T4	N0
GSM2235991	77	Male	T3	N2
GSM2236019	77	Male	T3	N2
GSM2235629	78	Male	T4	N1
GSM2235559	78	Male	T3	N2
GSM2235569	79	Male	T4	N1
GSM2235826	79	Male	T3	N2
GSM2235601	79	Male	T4	N2
GSM2235784	80	Male	T2	N0
GSM2235776	80	Male	T4	N0
GSM2235748	80	Male	T4	N2
GSM2235851	81	Male	T1	N0
GSM2235887	81	Male	T3	N2
GSM2235831	81	Male	T4	N3
GSM2235793	83	Male	T3	N2
GSM2235770	85	Male	T3	N1
GSM2236090	86	Male	T4	N0
